# Supplementary material
Source: MDPI journal article supplement (https://www.mdpi.com/2071-1050/13/13/7140)
Supplement: s1 [file s1]

| Keywords                          | Year | Strength | Begin | End  | 2016 - 2021 |
|-----------------------------------|------|----------|-------|------|-------------|
| big data                          | 2016 | 5.07     | 2016  | 2017 |             |
| urban development                 | 2016 | 3.66     | 2016  | 2017 |             |
| energy efficiency                 | 2016 | 3.37     | 2016  | 2017 |             |
| sensor network                    | 2016 | 3.12     | 2016  | 2018 |             |
| performance                       | 2016 | 2.85     | 2016  | 2017 |             |
| framework                         | 2016 | 2.85     | 2016  | 2017 |             |
| smart home                        | 2016 | 2.78     | 2016  | 2017 |             |
| mobile application                | 2016 | 2.75     | 2016  | 2018 |             |
| open innovation                   | 2016 | 2.75     | 2016  | 2018 |             |
| collaborative governance          | 2016 | 2.75     | 2016  | 2018 |             |
| giscience                         | 2016 | 2.74     | 2016  | 2017 |             |
| zigbee                            | 2016 | 2.36     | 2016  | 2018 |             |
| intelligent transportation system | 2016 | 2.36     | 2016  | 2018 |             |
| cyber-physical system             | 2016 | 2.26     | 2016  | 2017 |             |
| industry 4.0                      | 2016 | 3.17     | 2017  | 2018 |             |
| rfid                              | 2016 | 2.9      | 2017  | 2018 |             |
| indicator                         | 2016 | 2.79     | 2017  | 2019 |             |
| policy making                     | 2016 | 2.71     | 2017  | 2018 |             |
| vehicular network                 | 2016 | 2.54     | 2017  | 2018 |             |
| architecture                      | 2016 | 2.44     | 2017  | 2018 |             |
| challenge                         | 2016 | 2.55     | 2018  | 2019 |             |
| gamification                      | 2016 | 2.55     | 2018  | 2019 |             |
| transport                         | 2016 | 2.55     | 2018  | 2019 |             |
| hadoop                            | 2016 | 2.23     | 2018  | 2019 |             |
| china                             | 2016 | 2.23     | 2018  | 2019 |             |

Figure 1. Top 25 keywords with the strongest citation bursts in the second period.

Table 1. Top 20 most influential journals.

| No. | Source                                                   | Citations | Total link strength |
|-----|----------------------------------------------------------|-----------|---------------------|
| 1   | IEEE Access                                              | 3097      | 65501               |
| 2   | Cities                                                   | 2970      | 40245               |
| 3   | IEEE Internet of Things Journal                          | 2446      | 47813               |
| 4   | Lecture Notes in Computer Science                        | 2380      | 28247               |
| 5   | IEEE Communications Magazine                             | 2197      | 44382               |
| 6   | Future Generation Computer Systems                       | 1815      | 35204               |
| 7   | Journal of Urban Technology                              | 1646      | 24415               |
| 8   | Sensors                                                  | 1545      | 26767               |
| 9   | IEEE Communications Surveys & Tutorials                  | 1396      | 33283               |
| 10  | Technological Forecasting and Social Change              | 1231      | 21930               |
| 11  | Sustainable Cities and Society                           | 1227      | 22859               |
| 12  | IEEE Transactions on Intelligent Transportation Systems. | 1114      | 15047               |
| 13  | Sustainability                                           | 1092      | 16259               |
| 14  | Journal of Cleaner Production                            | 1064      | 20360               |
| 15  | IEEE Transactions on Vehicular Technology                | 1048      | 19963               |
| 16  | Urban Studies                                            | 1015      | 12212               |
| 17  | Computer Networks                                        | 1001      | 20069               |
| 18  | Government Information Quarterly                         | 988       | 12843               |
| 19  | IEEE Transactions on Industrial Informatics              | 966       | 20551               |
| 20  | IEEE Transactions on Smart Grid                          | 823       | 16094               |

Table 2. Countries making more contribution to the smart cities literature.

| No. | Country         | Documents | Citations | Total link strength |
|-----|-----------------|-----------|-----------|---------------------|
| 1   | USA             | 792       | 13881     | 343866              |
| 2   | Italy           | 495       | 13824     | 283551              |
| 3   | China           | 1094      | 11944     | 324940              |
| 4   | England         | 477       | 8789      | 285718              |
| 5   | Spain           | 385       | 6195      | 195162              |
| 6   | Australia       | 290       | 4725      | 187279              |
| 7   | Canada          | 247       | 4506      | 131231              |
| 8   | The Netherlands | 155       | 4004      | 171655              |
| 9   | South Korea     | 250       | 3979      | 95354               |
| 10  | India           | 413       | 3202      | 152965              |
| 11  | Greece          | 121       | 2762      | 87282               |
| 12  | France          | 169       | 2562      | 82445               |
| 13  | Saudi Arabia    | 217       | 2251      | 75767               |
| 14  | Germany         | 161       | 1974      | 93713               |
| 15  | Pakistan        | 196       | 1822      | 66714               |

|    |          |     |      |        |
|----|----------|-----|------|--------|
| 16 | Sweden   | 106 | 1731 | 92025  |
| 17 | Malaysia | 94  | 1433 | 39979  |
| 18 | Portugal | 119 | 1400 | 65173  |
| 19 | Finland  | 88  | 1383 | 58699  |
| 20 | Brazil   | 157 | 1378 | 123689 |

Table 3. Organizations that have made more contribution to the development of the field.

| No. | Organization                                             | Documents | Citations | Total link strength |
|-----|----------------------------------------------------------|-----------|-----------|---------------------|
| 1   | Polytechnic University of Milan                          | 37        | 1613      | 3403                |
| 2   | University of Naples Federico II                         | 35        | 1222      | 2635                |
| 3   | King Saud University                                     | 63        | 1176      | 1770                |
| 4   | MIT                                                      | 39        | 805       | 3045                |
| 5   | Chinese Academy of Sciences                              | 57        | 744       | 1641                |
| 6   | Huazhong University of Science and Technology            | 38        | 613       | 1685                |
| 7   | Utrecht University                                       | 32        | 613       | 4531                |
| 8   | University of Bologna                                    | 35        | 607       | 756                 |
| 9   | King Abdulaziz University                                | 46        | 567       | 1389                |
| 10  | KTH Royal Institute of Technology                        | 30        | 518       | 3233                |
| 11  | The Hong Kong Polytechnic University                     | 35        | 428       | 2730                |
| 12  | University of Ottawa                                     | 32        | 415       | 1053                |
| 13  | Tsinghua University                                      | 36        | 382       | 1566                |
| 14  | UCL                                                      | 36        | 347       | 2251                |
| 15  | Beijing University of Posts and Telecommunications       | 31        | 319       | 1477                |
| 16  | University of Electronic Science and Technology of China | 39        | 313       | 1365                |
| 17  | Southeast University                                     | 32        | 303       | 3233                |
| 18  | Valencia Polytechnic University                          | 33        | 270       | 895                 |
| 19  | Shanghai Jiao Tong University                            | 34        | 261       | 865                 |
| 20  | University of New South Wales                            | 30        | 259       | 1939                |

Table 4. Most influential documents.

| No. | Reference                                             | Paper title                                                         | Citation | Total link strength |
|-----|-------------------------------------------------------|---------------------------------------------------------------------|----------|---------------------|
| 1   | (Caragliu, Del Bo, & Nijkamp, 2011)                   | Smart Cities in Europe                                              | 384      | 1925                |
| 2   | (Albino, Berardi, & Dangelico, 2015)                  | Smart Cities: Definitions, Dimensions, Performance, and Initiatives | 329      | 1684                |
| 3   | (Hollands, 2008)                                      | Will the real smart city please stand up?                           | 292      | 1358                |
| 4   | (Zanella, Bui, Castellani, Vangelista, & Zorzi, 2014) | Internet of Things for Smart Cities                                 | 280      | 714                 |

|    |                                                            |                                                                                           |     |      |
|----|------------------------------------------------------------|-------------------------------------------------------------------------------------------|-----|------|
| 5  | (Kitchin, 2014)                                            | The real-time city? Big data and smart urbanism                                           | 273 | 1275 |
| 6  | (Neirrotti, De Marco, Cagliano, Mangano, & Scorrano, 2014) | Current trends in Smart City initiatives: Some stylised facts                             | 272 | 1503 |
| 7  | (Chourabi et al., 2012)                                    | <i>Understanding Smart Cities: An Integrative Framework</i>                               | 253 | 1195 |
| 8  | (Giffinger & Pichler-Milanović, 2007)                      | <i>Smart cities: Ranking of European medium-sized cities</i>                              | 241 | 1228 |
| 9  | (Vanolo, 2014)                                             | Smartmentality: The Smart City as Disciplinary Strategy                                   | 217 | 1317 |
| 10 | (Nam & Pardo, 2011)                                        | <i>Conceptualizing smart city with dimensions of technology, people, and institutions</i> | 202 | 1031 |
| 11 | (Batty et al., 2012)                                       | Smart cities of the future                                                                | 200 | 936  |
| 12 | (Atzori, Iera, & Morabito, 2010)                           | The Internet of Things: A survey                                                          | 181 | 362  |
| 13 | (Townsend, 2013)                                           | <i>Smart cities: Big data, civic hackers, and the quest for a new utopia</i>              | 176 | 855  |
| 14 | (Söderström, Paasche, & Klauser, 2014)                     | Smart cities as corporate storytelling                                                    | 165 | 1016 |
| 15 | (Hollands, 2014)                                           | Critical interventions into the corporate smart city                                      | 155 | 1033 |
| 16 | (Meijer & Bolívar, 2016)                                   | Governing the smart city: a review of the literature on smart urban governance            | 155 | 989  |
| 17 | (Gubbi, Buyya, Marusic, & Palaniswami, 2013)               | Internet of Things (IoT): A vision, architectural elements, and future directions         | 148 | 305  |
| 18 | (Bakıcı, Almirall, & Wareham, 2013)                        | A Smart City Initiative: the Case of Barcelona                                            | 141 | 872  |
| 19 | (Ahvenniemi, Huovila, Pinto-Seppa, & Airaksinen, 2017)     | What are the differences between sustainable and smart cities?                            | 138 | 839  |
| 20 | (Harrison et al., 2010)                                    | Foundations for Smarter Cities                                                            | 138 | 719  |

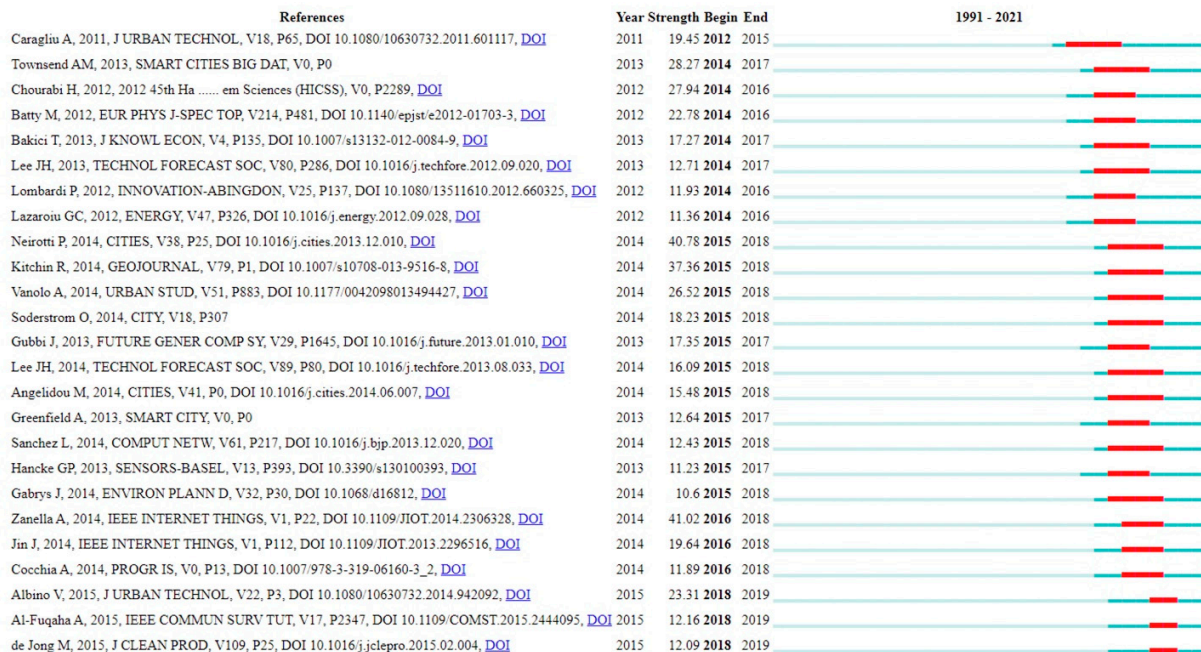

Figure 2. Top 25 references with the strongest citation bursts.

Table 5. The most influential authors.

| No. | Author              | Affiliation                                    | Citations | Total link strength |
|-----|---------------------|------------------------------------------------|-----------|---------------------|
| 1   | Rob Kitchin         | National University of Ireland Maynooth        | 771       | 5254                |
| 2   | Tan Yigitcanlar     | Queensland University of Technology            | 603       | 5089                |
| 3   | Andrea Caragliu     | Polytechnic University of Milan                | 585       | 5202                |
| 4   | Michael Batty       | UCL                                            | 441       | 3167                |
| 5   | Nicos Komninos      | Aristotle University of Thessaloniki           | 437       | 4745                |
| 6   | Nam Taewoo          | Sungkyunkwan University                        | 429       | 3661                |
| 7   | Margarita Angelidou | Aristotle University of Thessaloniki           | 356       | 4230                |
| 8   | Vito Albino         | Politecnico di Bari                            | 342       | 2865                |
| 9   | Robert Hollands     | Newcastle University                           | 309       | 3295                |
| 10  | Alberto Vanolo      | Università di Torino                           | 299       | 2997                |
| 11  | Hafedh Chourabi     | Université Laval                               | 293       | 2259                |
| 12  | Andrea Zanella      | University of Padova                           | 285       | 963                 |
| 13  | Paolo Neirotti      | Politecnico di Torino                          | 273       | 2524                |
| 14  | Renata Paola Dameri | University of Genoa                            | 262       | 2843                |
| 15  | Jung Hoon Lee       | Yonsei University                              | 247       | 2626                |
| 16  | Hans Kramar         | TU Wien                                        | 241       | 2135                |
| 17  | Simon Elias Bibri   | Norwegian University of Science and Technology | 239       | 1924                |
| 18  | Stephen Graham      | Newcastle University                           | 229       | 1918                |

|    |               |                        |     |      |
|----|---------------|------------------------|-----|------|
| 19 | Luigi Atzori  | University of Cagliari | 226 | 653  |
| 20 | Albert Meijer | Utrecht University     | 225 | 2212 |

## References

- Ahvenniemi, H., Huovila, A., Pinto-Seppa, I., & Airaksinen, M. (2017). What are the differences between sustainable and smart cities? *Cities*, *60*, 234-245. doi:10.1016/j.cities.2016.09.009
- Albino, V., Berardi, U., & Dangelico, R. M. (2015). Smart Cities: Definitions, Dimensions, Performance, and Initiatives. *Journal of Urban Technology*, *22*(1), 3-21. doi:10.1080/10630732.2014.942092
- Atzori, L., Iera, A., & Morabito, G. (2010). The Internet of Things: A survey. *Computer Networks*, *54*(15), 2787-2805. doi:<https://doi.org/10.1016/j.comnet.2010.05.010>
- Bakıcı, T., Almirall, E., & Wareham, J. (2013). A Smart City Initiative: the Case of Barcelona. *Journal of the Knowledge Economy*, *4*(2), 135-148. doi:10.1007/s13132-012-0084-9
- Batty, M., Axhausen, K. W., Giannotti, F., Pozdnoukhov, A., Bazzani, A., Wachowicz, M., . . . Portugali, Y. (2012). Smart cities of the future. *The European Physical Journal Special Topics*, *214*(1), 481-518. doi:10.1140/epjst/e2012-01703-3
- Caragliu, A., Del Bo, C., & Nijkamp, P. (2011). Smart Cities in Europe. *Journal of Urban Technology*, *18*(2), 65-82. doi:10.1080/10630732.2011.601117
- Chourabi, H., Nam, T., Walker, S., Gil-Garcia, J. R., Mellouli, S., Nahon, K., . . . Scholl, H. J. (2012, 4-7 Jan. 2012). *Understanding Smart Cities: An Integrative Framework*. Paper presented at the 2012 45th Hawaii International Conference on System Sciences.
- Giffinger, R., & Pichler-Milanović, N. (2007). *Smart cities: Ranking of European medium-sized cities*: Centre of Regional Science, Vienna University of Technology.
- Gubbi, J., Buyya, R., Marusic, S., & Palaniswami, M. (2013). Internet of Things (IoT): A vision, architectural elements, and future directions. *Future Generation Computer Systems*, *29*(7), 1645-1660. doi:<https://doi.org/10.1016/j.future.2013.01.010>
- Harrison, C., Eckman, B., Hamilton, R., Hartswick, P., Kalagnanam, J., Paraszcak, J., & Williams, P. (2010). Foundations for Smarter Cities. *Ibm Journal of Research and Development*, *54*(4), 1-16. doi:10.1147/JRD.2010.2048257
- Hollands, R. G. (2008). Will the real smart city please stand up? *City*, *12*(3), 303-320. doi:10.1080/13604810802479126
- Hollands, R. G. (2014). Critical interventions into the corporate smart city. *Cambridge Journal of Regions, Economy and Society*, *8*(1), 61-77. doi:10.1093/cjres/rsu011
- Kitchin, R. (2014). The real-time city? Big data and smart urbanism. *Geojournal*, *79*(1), 1-14. doi:10.1007/s10708-013-9516-8
- Meijer, A., & Bolívar, M. P. R. (2016). Governing the smart city: a review of the literature on smart urban governance. *International Review of Administrative Sciences*, *82*(2), 392-408. doi:10.1177/0020852314564308
- Nam, T., & Pardo, T. A. (2011). *Conceptualizing smart city with dimensions of technology, people, and institutions*. Paper presented at the Proceedings of the 12th Annual International Digital Government Research Conference: Digital Government Innovation in Challenging Times, College Park, Maryland, USA. <https://doi.org/10.1145/2037556.2037602>
- Neirotti, P., De Marco, A., Cagliano, A. C., Mangano, G., & Scorrano, F. (2014). Current trends in Smart City initiatives: Some stylised facts. *Cities*, *38*, 25-36. doi:<https://doi.org/10.1016/j.cities.2013.12.010>

- Söderström, O., Paasche, T., & Klauser, F. (2014). Smart cities as corporate storytelling. *City*, 18(3), 307-320. doi:10.1080/13604813.2014.906716
- Townsend, A. M. (2013). *Smart cities: Big data, civic hackers, and the quest for a new utopia*: WW Norton & Company.
- Vanolo, A. (2014). Smartmentality: The Smart City as Disciplinary Strategy. *Urban Studies*, 51(5), 883-898. doi:10.1177/0042098013494427
- Zanella, A., Bui, N., Castellani, A., Vangelista, L., & Zorzi, M. (2014). Internet of Things for Smart Cities. *Ieee Internet of Things Journal*, 1(1), 22-32. doi:10.1109/JIOT.2014.2306328
